# Supplementary material
Source: Elsevier journal article supplement (https://www.sciencedirect.com/science/article/pii/S1888441518301498)
Supplement: mmc1 [file S1888441518301498:mmc1.docx]

# anexo

**Tabla 1. Características basales de los pacientes y datos quirúrgicos.**

**
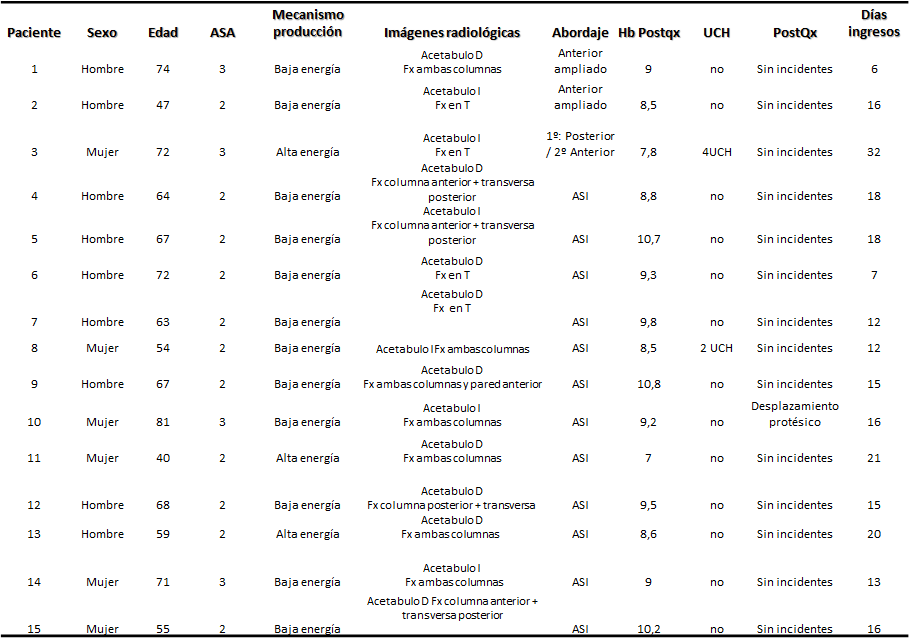
**

*ASI: Abordaje Anterior Supine Intermuscular; Fx: fractura*

***Tabla 2. Resultados clínicos y radiológicos durante el seguimiento***

| **Paciente** | **Fecha de ingreso** | **Meses total seguimiento** | **Mortalidad** | **Seguimiento Radiológico -Brooker score** | **HHS final** | **Ayuda de bastones** | **Merle D'Aubigné score** |
| --- | --- | --- | --- | --- | --- | --- | --- |
| *1* | *01/10/2009* | *13* | *Si* | *No* | *//* | *//* | *//* |
| *2* | *24/08/2007* | *130* | *No* | *No* | *93* | *No* | *Excelente* |
| *3* | *24/10/2013* | *45* | *No* | *Calcificaciones heterotópicas* | *84,7* | *Andador* | *Suficiente (14)* |
| *4* | *15/12/2013* | *42* | *No* | *no* | *96* | *No* | *Excelente* |
| *5* | *16/01/2014* | *41* | *No* | *No* | *99,8* | *No* | *Excelente* |
| *6* | *06/01/2014* | *41* | *No* | *No* | *98* | *No* | *Excelente* |
| *7* | *14/05/2014* | *37* | *No* | *no* | *96* | *No* | *Excelente* |
| *8* | *21/03/2015* | *39* | *No* | *Calcificaciones heterotópicas* | *92* | *Bastón* | *Excelente* |
| *9* | *10/06/2015* | *36* | *No* | *No* | *100* | *No* | *Excelente* |
| *10* | *30/07/2015* | *35* | *No* | *no* | *100* | *No* | *Excelente* |
| *11* | *17/10/2015* | *32* | *No* | *no* | *98* | *No* | *Excelente* |
| *12* | *18/01/2016* | *28* | *No* | *no* | *98* | *No* | *Excelente* |
| *13* | *15/04/2016* | *25* | *No* | *No* | *96* | *No* | *Excelente* |
| *14* | *09/09/2016* | *21* | *No* | *no* | *//* | *Bastón* | *Bueno* |
| *15* | *30/09/2016* | *20* | *No* | *no* | *100* | *No* | *Excelente* |
